# Supplementary material for: Distinct temporal difference error signals in dopamine axons in three regions of the striatum in a decision-making task
Source: eLife. 2020 Dec 21;9:e62390. doi: 10.7554/eLife.62390 (PMC7771962; doi:10.7554/eLife.62390)
Supplement: Figure 1—source data 1. [file elife-62390-fig1-data1.xlsx]

## Sheet: Sheet1
figure	measurement	mean	unit	test type	p-value	significance	confidence interval (95%)		t-/z-value	degree of freedom	std
Figure 1B	slope block2 - block1	0.003	%choiceBIG/%odor	t-test	0.45		-0.005	0.011	0.75	21	0.018
	bias block2 - block1	9.8	%odor	t-test	2.8 x 10-8	* (< 0.025)	7.3	12.1	8.5	21	5.3
Figure 1C	bias block2 - block1, slope fixed	9.7	%odor	Wilcoxon signed rank	4.0 x 10-5	* (< 0.05)			4.1
Figure 1F	big easy before - after	-1.8	%odor	Wilcoxon signed rank	0.24				-1.1
	big difficult before - after	-2.3	%odor	Wilcoxon signed rank	0.1				-1.6
	small easy before - after	-0.88	%odor	Wilcoxon signed rank	0.33				-0.95
	small difficult before - after	0.63	%odor	Wilcoxon signed rank	0.93				0.081
Fgure 1G	reaction time BIG - SMALL	-55.2	ms	t-test	4.9 x 10-5	* (< 0.05)	-77.8	-32.6	-5	21	51
	reaction time beta BIG	-1.5	ms/%odor	t-test	1.2 x 10-4	* (< 0.025)	-2.2	-0.8	-4.7	21	1.5
	reaction time beta SMALL	-0.5	ms/%odor	t-test	0.13		-1.2	0.1	-1.5	21	1.5
Figure 1H	premature exit correct - error	-6.3	%	t-test	9.5 x 10-8	* (< 0.05)	-8	-4.6	-7.9	21	3.7
