# Supplementary material for: Distinct temporal difference error signals in dopamine axons in three regions of the striatum in a decision-making task
Source: eLife. 2020 Dec 21;9:e62390. doi: 10.7554/eLife.62390 (PMC7771962; doi:10.7554/eLife.62390)
Supplement: Figure 2—source data 1. [file elife-62390-fig2-data1.xlsx]

## Sheet: Sheet1
figure	measurement	mean	unit	test type	p-value	significance	confidence interval (95%)		t-value	degree of freedom	std
Figure 2F	odor BIG - SMALL	0.3	Z-score/s	t-test	8.1 x 10-6	* (< 0.05)	0.19	0.41	5.8	21	0.24
	odor BIG - SMALL model	0.17	a.u.	t-test	9.5 x 10-5	* (< 0.05)	0.1	0.25	4.8	21	0.17
	big - medium(SMALL)	1.1	Z-score/s	t-test	1.6 x 10-11	* (< 0.017)	0.9	1.3	12.9	21	0.4
	medium(SMALL) - small	0.7	Z-score/s	t-test	2.9 x 10-9	* (< 0.017)	0.6	0.9	9.7	21	0.3
	medium BIG - SMALL	-0.19	Z-score/s	t-test	9.3 x 10-4	* (< 0.017)	-0.29	-0.08	-3.8	21	0.23
	big - medium(SMALL) model	1.1	a.u.	t-test	1.0 x 10-9	* (< 0.017)	0.9	1.3	10.3	21	0.5
	medium(SMALL) - small model	0.7	a.u.	t-test	9.2 x 10-8	* (< 0.017)	0.4	0.8	7.9	21	0.3
	medium BIG - SMALL model	-0.15	a.u.	t-test	0.0033	* (< 0.017)	-0.25	-0.05	-3.3	21	0.22
