# Supplementary material for: Distinct temporal difference error signals in dopamine axons in three regions of the striatum in a decision-making task
Source: eLife. 2020 Dec 21;9:e62390. doi: 10.7554/eLife.62390 (PMC7771962; doi:10.7554/eLife.62390)
Supplement: Figure 3—source data 1. [file elife-62390-fig3-data1.xlsx]

## Sheet: Sheet1
figure	measurement/condition	mean	unit	test type	p-value	significance	confidence interval (95%)		t-/f-vlaue	degree of freedom	std
Figure 3G	VS, DMS, DLS			ANOVA	0.016	* (< 0.05)			5.1	2, 19
	VS	0.43	Z-score/s	t-test	0.0015	* (< 0.017)	0.22	0.65	4.7	8	0.27
	DMS	0.2	Z-score/s	t-test	0.26		-0.2	0.61	1.2	6	0.44
	DLS	0.78	Z-score/s	t-test	1.9 x 10-4	* (< 0.017)	0.57	0.98	9.7	5	0.19
	VS, DMS			t-test	0.21		-0.15	0.62	1.2	14	0.35
	VS, DLS			t-test	0.021		-0.62	-0.05	-2.6	13	0.25
	DMS, DLS			t-test	0.013	* (< 0.017)	0.14	1	2.9	11	0.35
	anterior-posterior	-0.18	Z-score/mm	linear regression	0.18				-1.3
	medial-lateral	0.22	Z-score/mm	(3 parameters)	0.1				1.6
	dorsal-ventral	0.4	Z-score/mm		0.023				2.4
