# Supplementary material for: Distinct temporal difference error signals in dopamine axons in three regions of the striatum in a decision-making task
Source: eLife. 2020 Dec 21;9:e62390. doi: 10.7554/eLife.62390 (PMC7771962; doi:10.7554/eLife.62390)
Supplement: Figure 4—source data 1. [file elife-62390-fig4-data1.xlsx]

## Sheet: Sheet1
figure	measurement/condition	mean/coefficient	unit	test type	p-value	significance	confidence interval (95%)		t-/f-vlaue	degree of freedom	std
Figure 4D	VS, DMS, DLS (big - medium)			ANOVA	0.028				4.33	2, 19
	VS, DMS, DLS (medum - small)			ANOVA	0.43				0.87	2, 19
	VS, DMS, DLS (medium BIG - SMALL)			ANOVA	0.34				1.11	2, 19
	zero-crossing points VS	0.49	water amount								0.28
	zero-crossing points DMS	0.99	water amount								0.51
	zero-crossing points DLS	0.18	water amount								0.15
	VS, DMS, DLS (zero-crossing BIG)			ANOVA	0.0021	* (< 0.01)			8.6	2, 19
	VS, DMS, DLS (zero-crossing SMALL)			ANOVA	0.0023	* (< 0.01)			8.5	2, 19
	VS, DMS (zero-crossing BIG)			t-test	0.028		-0.92	-0.06	-2.4	14	0.40
	VS, DLS (zero-crossing BIG)			t-test	0.030		0.03	0.58	2.4	13	0.24
	DMS, DLS (zero-crossing BIG)			t-test	0.0039	* (< 0.017)	0.31	1.29	3.6	11	0.39
	VS, DMS (zero-crossing SMALL)			t-test	0.085		-0.67	0.05	-1.8	14	0.33
	VS, DLS (zero-crossing SMALL)			t-test	0.0076	* (< 0.017)	0.11	0.60	3.1	13	0.21
	DMS, DLS (zero-crossing SMALL)			t-test	0.0026	* (< 0.017)	0.28	1.04	3.88	11	0.30
Figure 4E	anterior-posterior	-5.4	zero crossing/mm	linear regression	0.72				-0.3
	medial-lateral	-43.1	zero crossing/mm	(3 parameters)	0.011	* (< 0.017)			-2.8
	dorsal-ventral	-50.8	zero crossing/mm		0.014	* (< 0.017)			-2.7
