# Supplementary material for: Distinct temporal difference error signals in dopamine axons in three regions of the striatum in a decision-making task
Source: eLife. 2020 Dec 21;9:e62390. doi: 10.7554/eLife.62390 (PMC7771962; doi:10.7554/eLife.62390)
Supplement: Figure 5—source data 1. [file elife-62390-fig5-data1.xlsx]

## Sheet: Sheet1
figure	measurement/condition	mean	unit	test type	p-value	significance	confidence interval (95%)		t-/f-vlaue	degree of freedom	std
Figure 5C	small water (VS)	-0.37	Z-score/s	t-test	0.044		-0.74	-0.01	-2.3	8	0.47
	small water (DMS)	-0.42	Z-score/s	t-test	0.0040	* (< 0.017)	-0.64	-0.19	-4.5	6	0.24
	small water (DLS)	0.37	Z-score/s	t-test	0.020		0.08	0.65	3.3	5	0.27
	VS, DMS, DLS (small water)			ANOVA	0.0013	* (< 0.05)			9.62	2, 19
	VS, DMS (small water)			t-test	0.83		-0.38	0.46	0.20	14	0.39
	VS, DLS (small water)			t-test	0.0041	* (< 0.017)	-1.21	-0.28	-3.4	13	0.41
	DMS, DLS (small water)			t-test	1.8 × 10-4	* (< 0.017)	-1.10	-0.47	-5.5	11	0.25
Figure 5F	error (VS)	-0.65	Z-score/s	t-test	6.2 × 10-4	* (< 0.017)	-0.93	-0.37	-5.4	8	0.36
	error (DMS)	-0.48	Z-score/s	t-test	3.5 × 10-5	* (< 0.017)	-0.59	-0.37	-10.9	6	0.11
	error (DLS)	0.11	Z-score/s	t-test	0.30		-0.14	0.36	1.1	5	0.24
	VS, DMS, DLS (error)			ANOVA	1.3 × 10-4	* (< 0.05)			14.7	2, 19
	VS, DMS (error)			t-test	0.25		-0.47	0.13	-1.1	14	0.28
	VS, DLS (error)			t-test	5.6 × 10-4	* (< 0.017)	-1.13	-0.40	-4.5	13	0.32
	DMS, DLS (error)			t-test	1.2 × 10-4	* (< 0.017)	-0.82	-0.36	-5.7	11	0.18
Figure 5I	CS minus (VS)	-0.32	Z-score/s	t-test	1.4 × 10-4	* (< 0.017)	-0.43	-0.21	-6.7	8	0.14
	CS minus (DMS)	-0.23	Z-score/s	t-test	1.0 × 10-5	* (< 0.017)	-0.28	-0.19	-13.4	6	0.04
	CS minus (DLS)	0.24	Z-score/s	t-test	0.17		-0.15	0.63	1.5	5	0.37
	VS, DMS, DLS (CS minus)			ANOVA	2.5 × 10-4	* (< 0.05)			13.1	2, 19
	VS, DMS (CS minus)			t-test	0.16		-0.20	0.03	-1.4	14	0.11
	VS, DLS (CS minus)			t-test	0.0012	* (< 0.017)	-0.86	-0.26	-4.1	13	0.26
	DMS, DLS (CS minus)			t-test	0.0065	* (< 0.017)	-0.79	-0.16	-3.3	11	0.25
