# Supplementary material for: Distinct temporal difference error signals in dopamine axons in three regions of the striatum in a decision-making task
Source: eLife. 2020 Dec 21;9:e62390. doi: 10.7554/eLife.62390 (PMC7771962; doi:10.7554/eLife.62390)
Supplement: Figure 6—source data 1. [file elife-62390-fig6-data1.xlsx]

## Sheet: Sheet1
figure	measurement/condition	mean/coefficient	uinit	test type	p-value	significance	confidence interval (95%)		t-/f-vlaue	degree of freedom	std
Figure 6B	choice BIG, before choice	0.51	zscore/odor	linear regression	5.6 × 10-6	* (< 0.025)	0.33	0.68	6.0	21	0.39
	choice SMALL, before choice	-0.05	zscore/odor	linear regression	0.42		-0.19	0.08	-0.8	21	0.31
Figure 6C	choice BIG, after choice	0.41	zscore/odor	linear regression	1.4 × 10-5	* (< 0.025)	0.26	0.57	5.6	21	0.34
	choice SMALL, after choice	0.30	zscore/odor	linear regression	2.2 × 10-4	* (< 0.025)	0.16	0.45	4.4	21	0.32
Figure 6D	beta before choice - beta after choice, easy	0.11	zscore/odor	t-test	0.026	* (< 0.05)	0.01	0.20	2.3	21	0.21
Figure 6E	beta before choice - beta after choice, small	-0.25	zscore/odor	t-test	0.0078	* (< 0.05)	-0.42	-0.07	-2.9	21	0.40
Figure 6F	VS, DMS, DLS (beta before choice - beta after choice)			ANOVA	0.86				0.15	2, 19
Figure 6G	VS, DMS, DLS (beta before choice - beta after choice)			ANOVA	0.25				1.46	2, 19
