# Supplementary material for: Distinct temporal difference error signals in dopamine axons in three regions of the striatum in a decision-making task
Source: eLife journal article supplement (doi:10.7554/elife.62390), 2020-12-21
Supplement: supp [file elife-62390-supp-v1.zip]

**Figure 3-figure supplement 1**

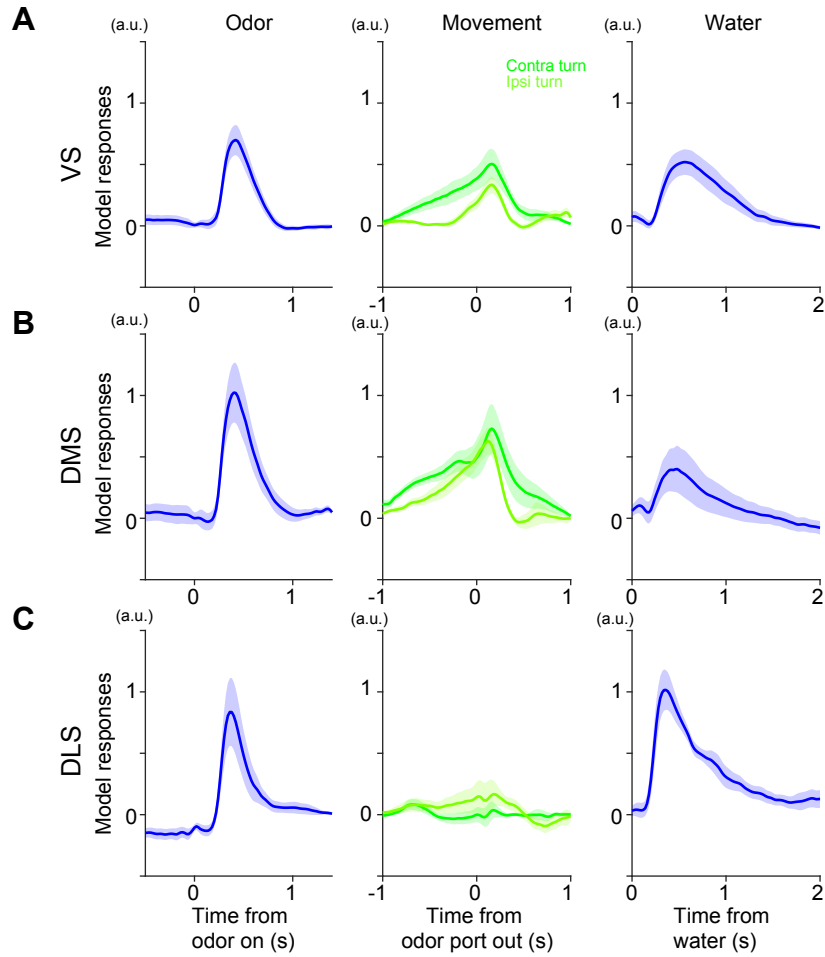

**Figure 3-figure supplement 1. Model responses in a task with fixed amounts of reward**  
Responses at odor onset, odor port out (choice movement onset) and water onset in Kernel models fitted with dopamine axon responses in VS (A), DMS (B) and DLS (C). Arbitrary unit (a.u.) was determined by model-fitting with z-score of GCaMP signals. n=9,7,6 animals for VS, DMS, DLS. mean  $\pm$  SEM.
