# Supplementary material for: Distinct temporal difference error signals in dopamine axons in three regions of the striatum in a decision-making task
Source: eLife journal article supplement (doi:10.7554/elife.62390), 2020-12-21
Supplement: supp [file elife-62390-supp-v1.zip]

**Figure 7-figure supplement 1**

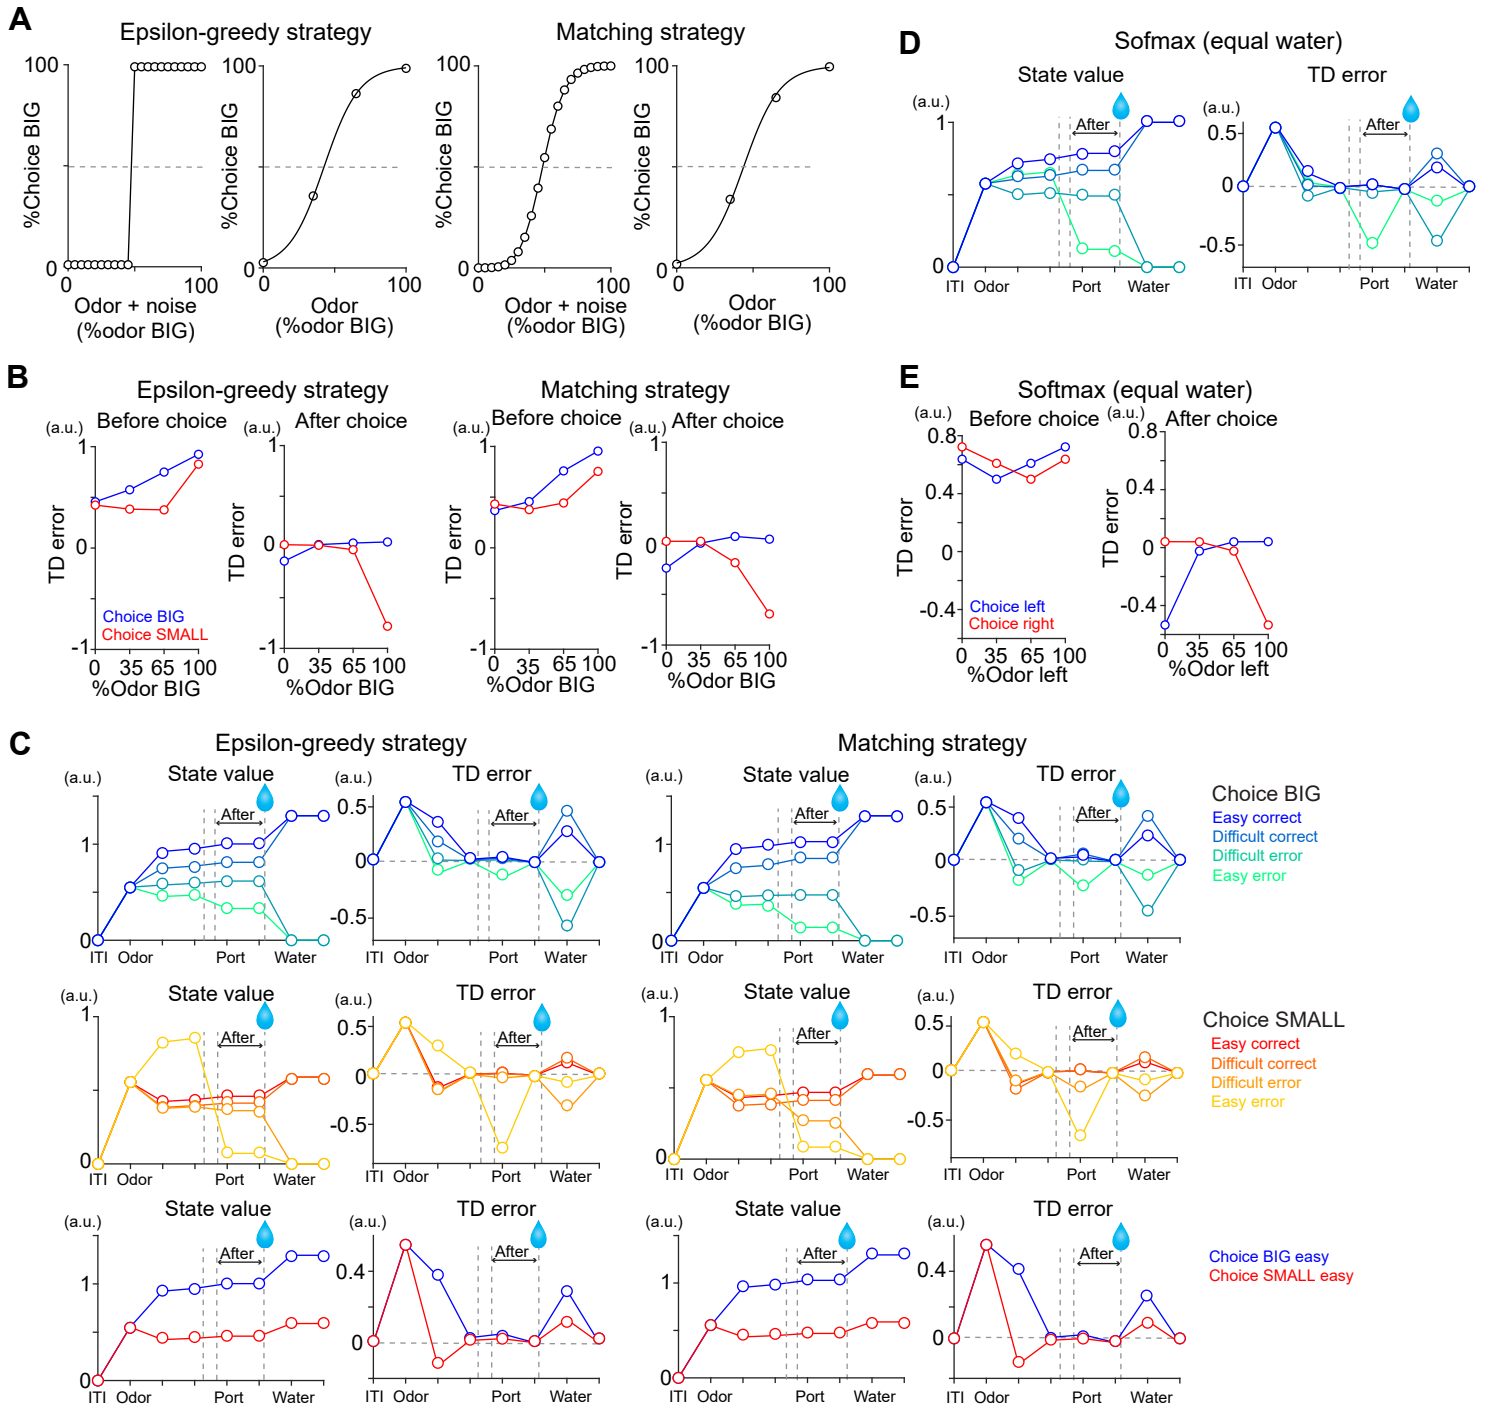

**Figure 7-figure supplement 1. TD errors with stochastic choice strategies.** (A) choice for each subjective odor (left) and choice for each objective odor (right) with epsilon greedy strategy and matching strategy. (B) TD errors with different sensory evidence (odor %) before and after choice in each model. (C) The temporal dynamics of state values and TD errors in each model. (D) The temporal dynamics of state values and TD errors with a softmax choice strategy (Figure 7D) but with equal amounts of water for both water ports. (E) TD errors with different levels of sensory evidence (odor %) before and after choice in model from D. Arbitrary unit (a.u.) was determined by value of standard reward as 1 (see Materials and Methods).
