# Supplementary material for: Distinct temporal difference error signals in dopamine axons in three regions of the striatum in a decision-making task
Source: eLife journal article supplement (doi:10.7554/elife.62390), 2020-12-21
Supplement: supp [file elife-62390-supp-v1.zip]

**Figure 7-figure supplement 5**

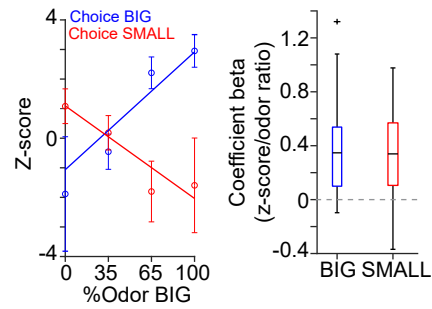

**Figure 7-figure supplement 5. Dopamine axon responses while animals stayed at water port** Dopamine axon responses after choice (0-1 s after water port in) were fitted with linear regression with stimulus evidence (odor %) and coefficient beta (slope) for all the animals are plotted, similar to Figure 6C, but excluding trials with premature (<1s) exit of water port. Correlation slopes were significantly positive for both choice of the BIG side ( $t(21) = 4.8$ ,  $p=7.9\times 10^{-5}$ ) and of the SMALL side ( $t(21) = -4.4$ ,  $p=2.3\times 10^{-4}$ ). one sample t-test,  $n = 22$  animals.
