# Supplementary material for: Distinct temporal difference error signals in dopamine axons in three regions of the striatum in a decision-making task
Source: eLife journal article supplement (doi:10.7554/elife.62390), 2020-12-21
Supplement: supp [file elife-62390-supp-v1.zip]

**Figure 7-figure supplement 2**

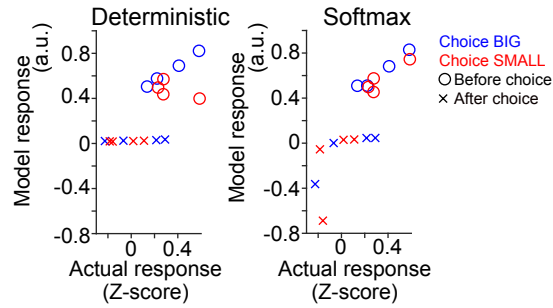

**Figure 7-figure supplement 2. Comparison of model and actual responses** Model responses were compared with average actual responses before choice (1-0s before odor port out) and after choice (0-1s after water port in) in scatter plots. Arbitrary unit (a.u.) was determined by value of standard reward as 1 (see Materials and Methods).
