# Supplementary material for: Distinct temporal difference error signals in dopamine axons in three regions of the striatum in a decision-making task
Source: eLife journal article supplement (doi:10.7554/elife.62390), 2020-12-21
Supplement: supp [file elife-62390-supp-v1.zip]

**Figure 4-figure supplement 1**

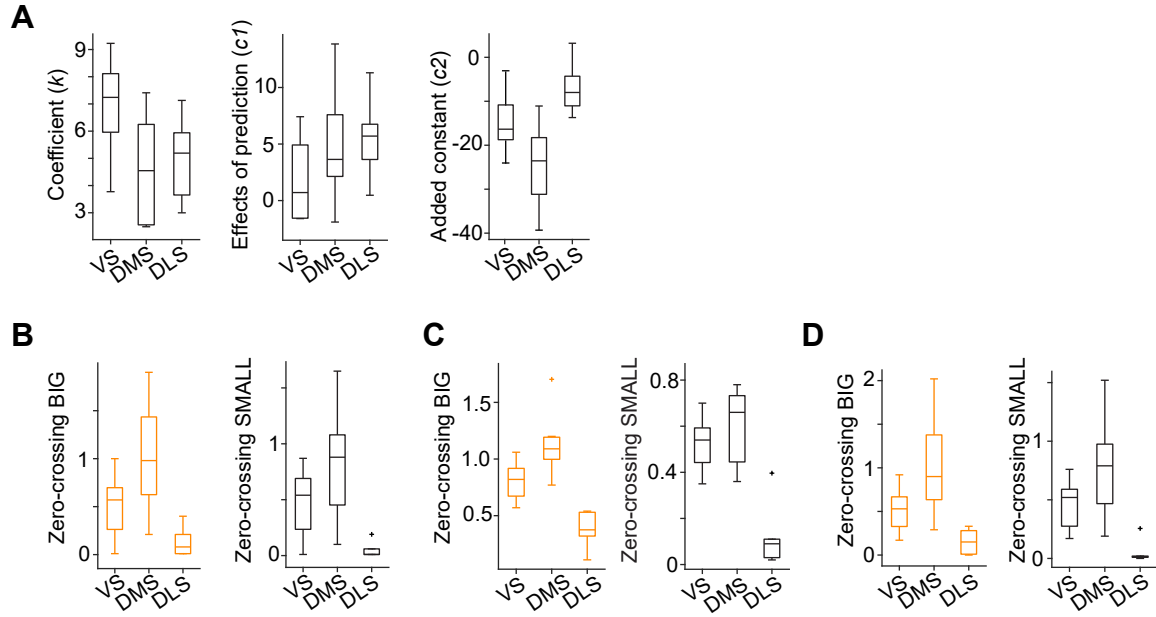

**Figure 4-figure supplement 1. Zero-crossing points across the striatum with different methods** (A) Each regression coefficient in the response function shown in Figure 4C. Fitting was performed by  $\text{response} = k R + c_1 \times S + c_2$ , where R is the water amount, S is SMALL side (see Materials and Methods). (B) Zero-crossing points with linear function ( $F(2,19) = 8.7$ ,  $p=0.0021$  for BIG;  $F(2,19) = 7.5$ ,  $p=0.0038$  for SMALL, ANOVA). (C) Zero-crossing points with power function using a before-water time window (-1 to -0.2 s before water) as baseline. ( $F(2,19) = 20.5$ ,  $p=1.7 \times 10^{-5}$  for BIG;  $F(2,19) = 21.6$ ,  $p=1.2 \times 10^{-5}$  for SMALL, ANOVA). (D) Zero-crossing points using kernel models with power function ( $F(2,19) = 9.4$ ,  $p=0.0014$  for BIG;  $F(2,19) = 10.1$ ,  $p=0.0011$ , ANOVA).  $n = 9, 7, 6$  animals for VS, DMS, DLS.
