# Supplementary material for: Distinct temporal difference error signals in dopamine axons in three regions of the striatum in a decision-making task
Source: eLife journal article supplement (doi:10.7554/elife.62390), 2020-12-21
Supplement: supp [file elife-62390-supp-v1.zip]

Figure 2-figure supplement 1

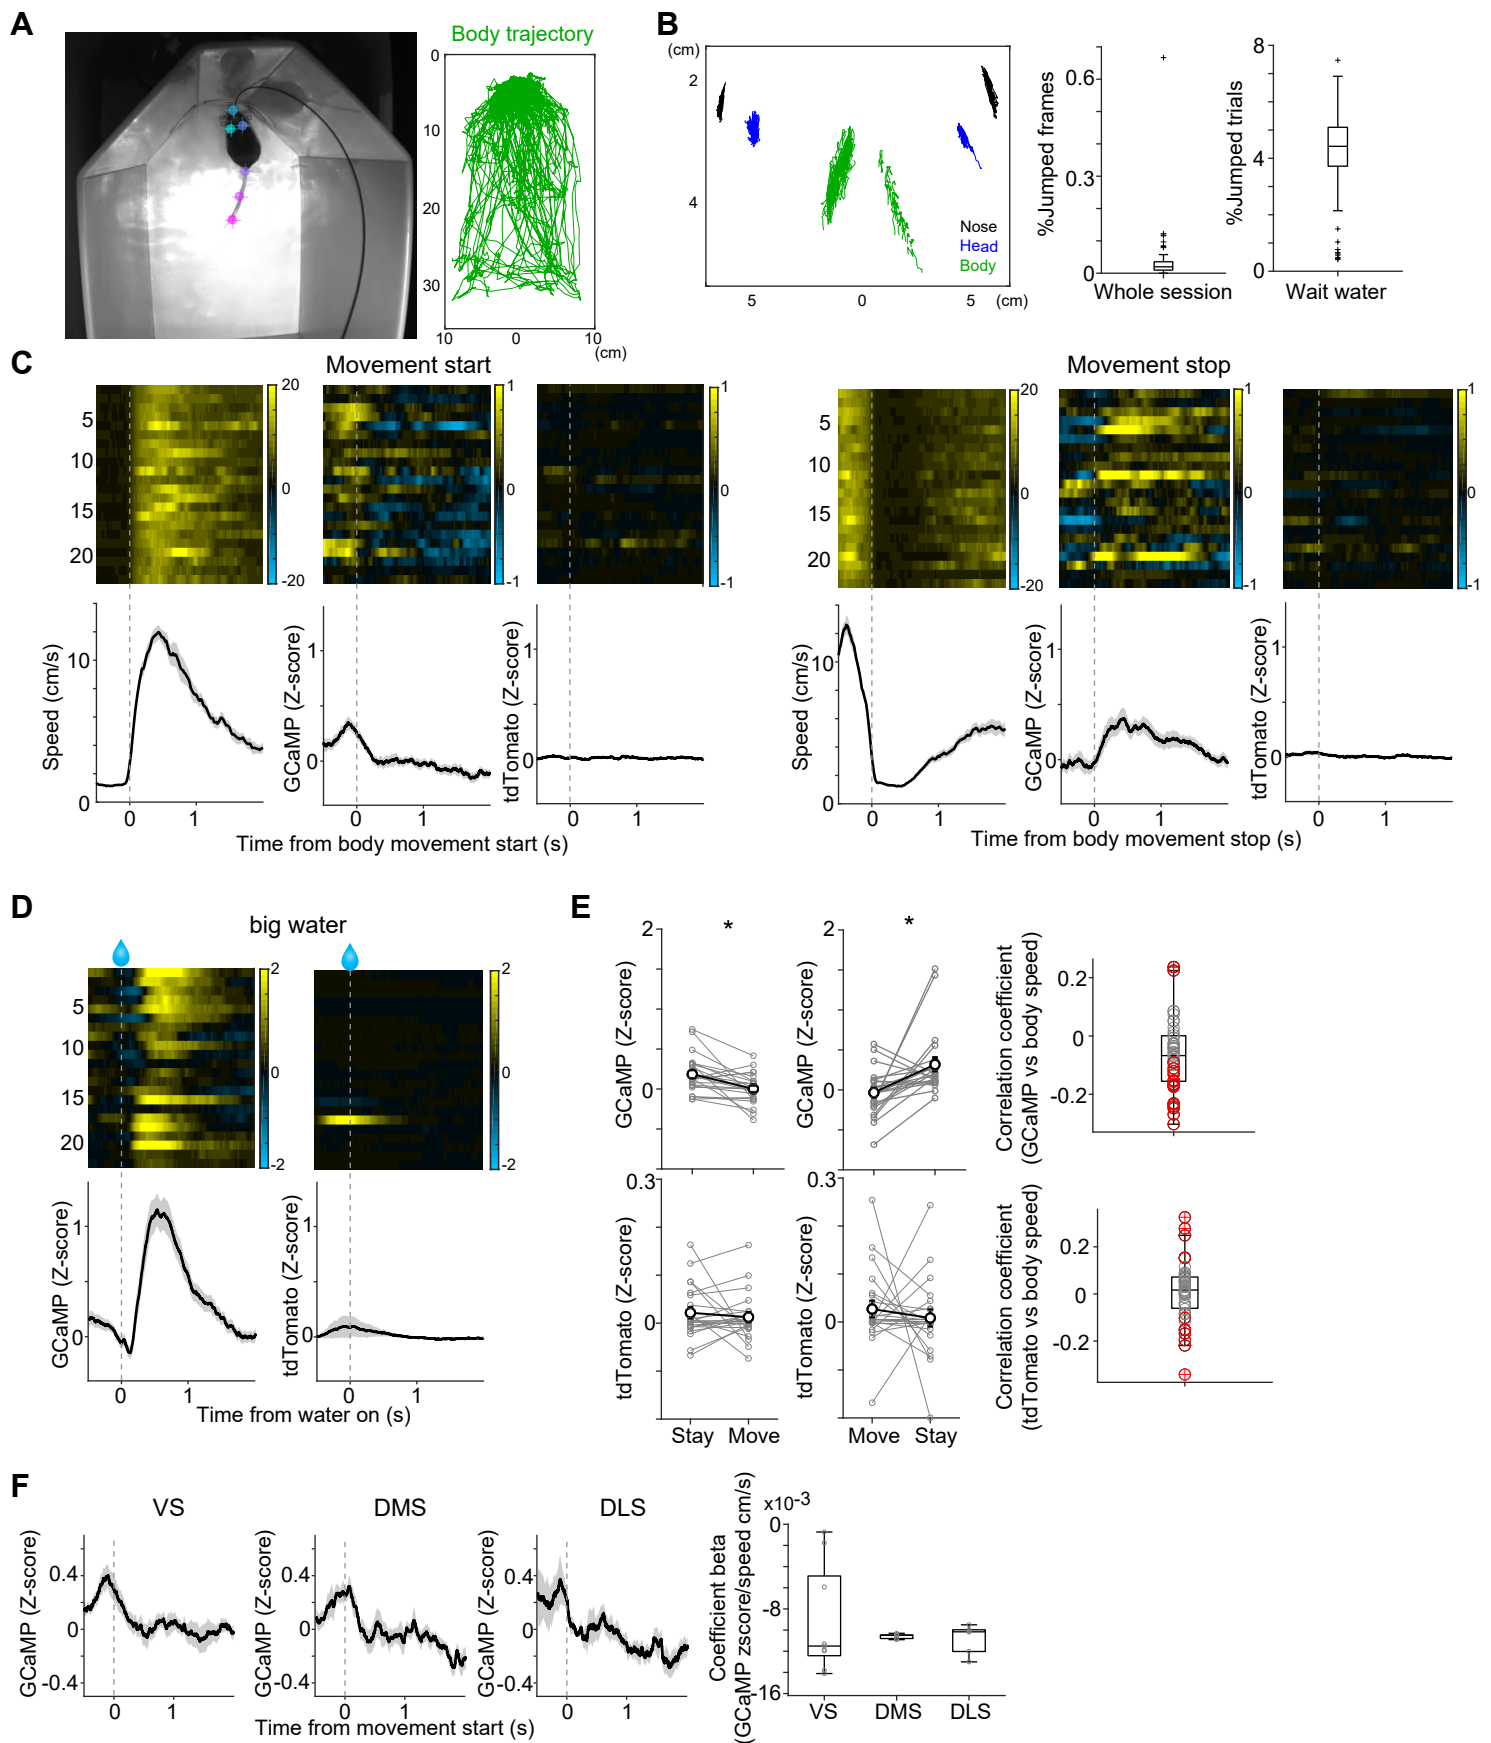

**Figure 2-figure supplement 1. Dopamine axon activity outside of the task (A)**

Labeling of body parts by DeepLabCut. (B) Verification of tracking. Disconnected tracking was detected by 5.5cm displacement with one frame (Whole session). Nose tracking was verified in frames when a mouse stays at a water port for <1s (Wait water). Trials when the tracked nose positions stayed within 2cm were used for further analyses in later sections. n=43 videos. (C) GCaMP and tdTom signals when a mouse starts or stops movement (>3cm/s) for >0.5s (mean  $\pm$  SEM, n = 22 animals) outside of the task. (D) Responses to big water in the same videos as C are shown for comparison. (E) Left, GCaMP signals were decreased when a mouse moves ( $t(21) = 3.4$ ,  $p=2.3 \times 10^{-3}$  for start;  $t(21) = 3.0$ ,  $p=5.6 \times 10^{-3}$  for stop, n = 22 animals, paired t-test), whereas tdTom did not show consistent modulation ( $t(21) = 0.6$ ,  $p=0.51$  for start;  $t(21) = -0.6$ ,  $p=0.54$  for stop, n = 22 animals, paired t-test). Right, Pearson's correlation coefficients of GCaMP signals and body speed of random frames (5000 frames per video) are slightly but significantly negative ( $t(42) = -3.2$ ,  $p=0.0021$ , n = 43 videos, one sample t-test). Whereas tdTom and body speed did not show consistent correlation ( $t(42) = 0.5$ ,  $p=0.56$ , n = 43 videos, one sample t-test), signals in each video showed significant correlation, indicating motion artifacts in recording. Red circle indicates significant correlation coefficient for each video. (F) GCaMP signals in all 3 striatal areas showed similar modulation by movement ( $F(2,19) = 0.35$ ,  $p=0.71$ , ANOVA).
