# Supplementary material for: Distinct temporal difference error signals in dopamine axons in three regions of the striatum in a decision-making task
Source: eLife journal article supplement (doi:10.7554/elife.62390), 2020-12-21
Supplement: supp [file elife-62390-supp-v1.zip]

### Figure 7-figure supplement 3

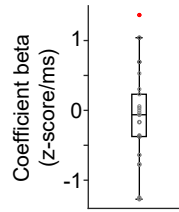

**Figure 7-figure supplement 3. Correlation between dopamine axon signals and reaction time** Linear regression of dopamine axon signals before choice with reaction time. Although both dopamine axon signals before choice and reaction time are similarly modulated by state value (Figure 1G, Figure 6B, Figure 7H, I), they do not show trial-to-trial correlation ( $t(21) = -0.6$ ,  $p=0.55$ , one sample t-test,  $n = 22$  animals).
