# Supplementary material for: Distinct temporal difference error signals in dopamine axons in three regions of the striatum in a decision-making task
Source: eLife journal article supplement (doi:10.7554/elife.62390), 2020-12-21
Supplement: supp [file elife-62390-supp-v1.zip]

**Figure 1-figure supplement 1**

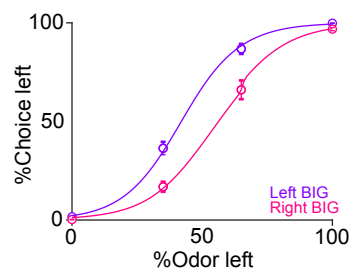

**Figure 1-figure supplement 1. Average psychometric curve in odor manipulation blocks**

% of choice of a left port when a left port is the BIG side or when a right port is the BIG side (mean  $\pm$  SEM) and the average psychometric curve for each case. n=22 animals.
